# Supplementary material
Source: Springer Nature journal article supplement (https://www.springermedizin.de/resource/supplementary/12885_2013_4716_MOESM3_ESM.pdf/9466978)

A

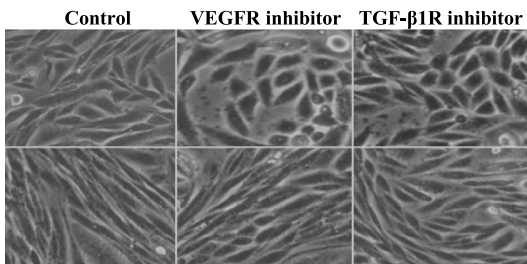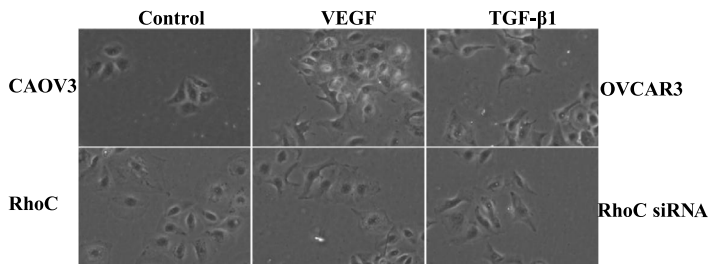

B

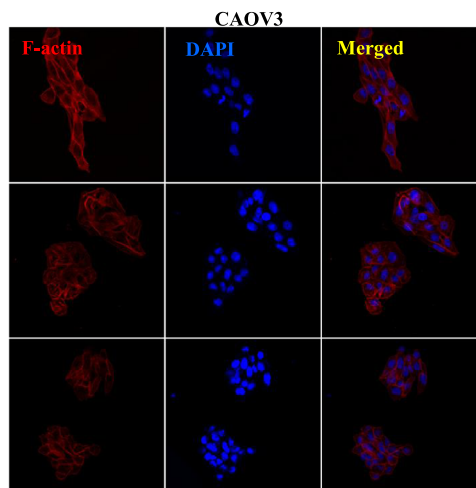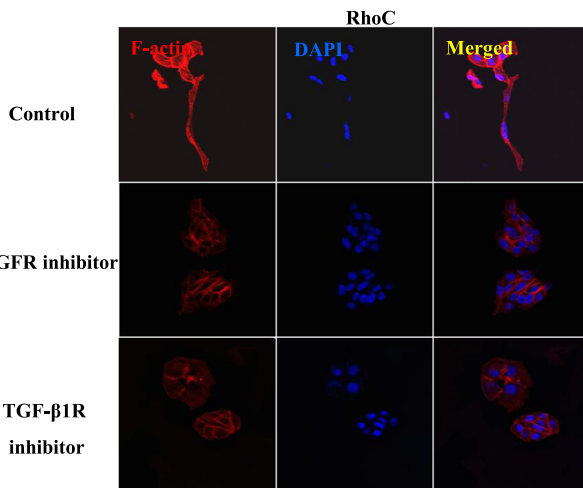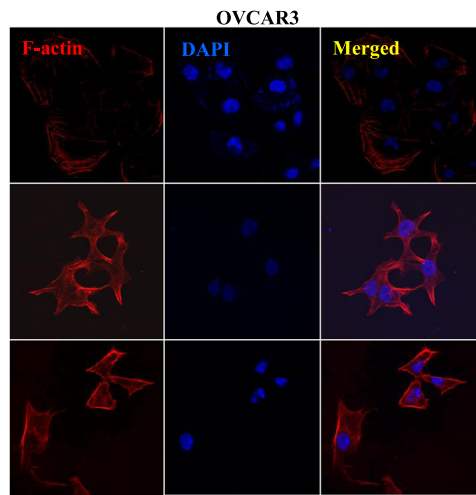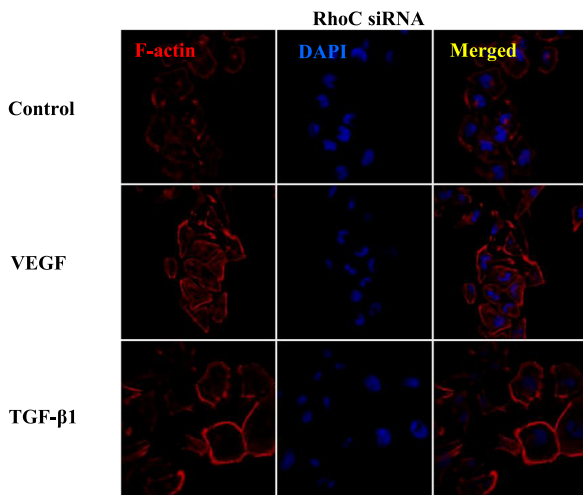

Supplement: MOESM3 [file 9466978]
